# Supplementary material for: Studies on the DIDS-binding Site of Monocarboxylate Transporter 1 Suggest a Homology Model of the Open Conformation and a Plausible Translocation Cycle
Source: PubMed Central journal article supplement — J Biol Chem. 2009 May 27;284(30):20011–21. doi: 10.1074/jbc.M109.014217 (PMC2740427; doi:10.1074/jbc.m109.014217), 2009-05-27
Supplement: M109.014217_1.pdf [file M109.014217_1.pdf]

**STUDIES ON THE DIDS BINDING SITE OF MONOCARBOXYLATE  
TRANSPORTER 1 SUGGEST A HOMOLOGY MODEL OF THE OPEN  
CONFORMATION AND A PLAUSIBLE TRANSLOCATION CYCLE**

**Marieangela C. Wilson, David Meredith, Chotirote Bunnun, Richard B.  
Sessions & Andrew P. Halestrap**

**Supplementary Material**

**Table 1S Primers used in PCR generation of site-directed mutants of MCT1 and embigin**

| <b>Mutant</b>           | <b>Sense Primer</b>                      | <b>Anti-sense Primer</b>               |
|-------------------------|------------------------------------------|----------------------------------------|
| Rat MCT1 K38Q           | cctatgcatttcccacatccatcactgtc            | gacagtgatggattgggaaatgcatagg           |
| Rat MCT1 K38R           | cctatgcatttcccagatccatcactgtc            | gacagtgatggatctgggaaatgcatagg          |
| Rat MCT1 K45Q           | ccatcactgtctctttcaagagattgaaattatat      | atataatttcaatctctctaaagaagacagtgatgg   |
| Rat MCT1 K45R           | ccatcactgtctcttttagagagattgaaattatat     | atataatttcaatctctctaaagaagacagtgatgg   |
| Rat MCT1 K282Q          | ctttcttagtaattatgggtcagagtaagcattttccag  | ctggaaaaatgcttactctgaccataactaagaag    |
| Rat MCT1 K282R          | ctttcttagtaattatggtaggagtaagcattttccag   | ctggaaaaatgcttactctaccataactaagaag     |
| Rat MCT1 K284Q          | gtaattatggtaagagtcagcattttccagtgtgag     | ctcactggaaaaatgctgactcttaccataattac    |
| Rat MCT1 K282Q K284Q    | gtaattatggtcagagtcagcattttccagtgtgag     | ctcactggaaaaatgctgactctgaccataattac    |
| Rat MCT1 K282R K284R    | gtaattatggtaggagtaggacattttccagtgtgag    | ctcactggaaaaatgcttactctaccataattac     |
| Rat MCT1 K290Q          | cattttccagtgtgagcagtcagccttctctcc        | ggagggaaggctgactgctcactggaaaaatg       |
| Rat MCT1 K290R          | cattttccagtgtgagcagtcagccttctctcc        | ggagggaaggctgaccgctcactggaaaaatg       |
| Rat MCT1 K413Q          | gtatggagactaccaatacacatactggg            | cccagtatgtgtattggtagtctccatac          |
| Rat MCT1 K413R          | gtatggagactacagatacacatactggg            | cccagtatgtgtatctgtagtctccatac          |
|                         |                                          |                                        |
| Rat Embigin K104Q K105Q | gaatgtgacttggcagcaagatgacgcgc            | gcgcgtcatcttgcctccaagtcaattc           |
| Rat Embigin K120Q       | ggtttcaatacaactcaaatgggggacac            | gtgtccccatttgagttgtattgaaacc           |
| Rat Embigin K137Q K141Q | ccgttttaatagccaacaaatgggacaatactcttgttcc | ggaaacaagagattgtcccatttggctattaaaaacgg |
| Rat Embigin K224Q K226Q | cgaacaaaagctccagggtacagcacttttggagg      | cctccaaaaggtgctgtactggagcttgttctg      |
| Rat Embigin K252Q       | gagggaacacattcagctggtgtgtctg             | cagcacaaccagctgaatgtgttctc             |
| Rat Embigin K263Q       | catggtgctctccagccattccttgc               | ggcaagggaatggctggagagggcaccatg         |
| Rat Embigin C144A       | gggaaaatactctgcttctctggagaag             | cttctccaaggaaagcagagtatttccc           |
| Rat Embigin C180A       | ctactgtgctaaaggctgaatgtcaaaattgtc        | gacaatttgcattcagccttagcacagtag         |
| Rat Embigin C182A       | gtgctaaagtgtgaagctcaaaattgtctcc          | ggagacaattttagcttcacacttagcac          |
| Rat Embigin C180A C182A | ctactgtgctaaaggctgaagctcaaaattgtctcc     | ggagacaattttagcttcagccttagcacagtag     |

**Table 2S Uninhibited rates of lactate transport into *Xenopus laevis* oocytes mediated by the different MCT1 mutants**

| <b>Mutation</b>        | <b>Rate of lactate uptake<br/>(pMol per egg in 10 min)</b> | <b>N<br/>value</b> |
|------------------------|------------------------------------------------------------|--------------------|
| Wild type              | 535 ± 14                                                   | 167                |
| K38Q                   | 48 ± 7                                                     | 40                 |
| K38R                   | 34 ± 4                                                     | 30                 |
| K45R                   | 500 ± 28                                                   | 25                 |
| K45Q                   | 425 ± 36                                                   | 25                 |
| K282Q                  | 302 ± 38                                                   | 20                 |
| K282R                  | 369 ± 30                                                   | 26                 |
| K284Q                  | 650 ± 46                                                   | 20                 |
| K290Q                  | 390 ± 38                                                   | 20                 |
| K413Q                  | 385 ± 45                                                   | 17                 |
| K413R                  | 446 ± 25                                                   | 26                 |
| K45Q/K282Q             | 301 ± 15                                                   | 26                 |
| K45R/K282Q             | 344 ± 17                                                   | 20                 |
| K45Q/K282R             | 509 ± 23                                                   | 20                 |
| K45R/K282R             | 656 ± 21                                                   | 12                 |
| K45Q/K413Q             | 413 ± 19                                                   | 25                 |
| K45Q/K413R             | 243 ± 18                                                   | 20                 |
| K45R/K413Q             | 442 ± 38                                                   | 15                 |
| K45R/K413R             | 485 ± 34                                                   | 12                 |
| K282Q/K284Q            | 573 ± 43                                                   | 17                 |
| K282R/K284Q            | 459 ± 27                                                   | 20                 |
| K282Q/413Q             | 445 ± 25                                                   | 46                 |
| K282Q/K413R            | 464 ± 41                                                   | 13                 |
| K282R/K413Q            | 470 ± 25                                                   | 41                 |
| K282R/K413R            | 426 ± 12                                                   | 20                 |
| K284Q/K413Q            | 666 ± 62                                                   | 16                 |
| K45/K282Q/K413Q        | 286 ± 20                                                   | 24                 |
| K45/K284Q/K413Q        | 420 ± 36                                                   | 30                 |
| K45Q/K282R/K413R       | 299 ± 27                                                   | 28                 |
| K45R/K282Q/K413Q       | 405 ± 34                                                   | 20                 |
| K45R/K282Q/K413R       | 322 ± 21                                                   | 26                 |
| K45R/K282R/K413Q       | 394 ± 22                                                   | 20                 |
| K45Q/K282R/K413Q       | 223 ± 14                                                   | 20                 |
| K45R/K282R/K413R       | 308 ± 12                                                   | 20                 |
| K282Q/K284Q/K413Q      | 484 ± 13                                                   | 30                 |
| K45Q/K282Q/K413R       | 239 ± 13                                                   | 20                 |
| K282R/K284Q/K413Q      | 420 ± 12                                                   | 20                 |
| K45Q/K282Q/K284Q/K413Q | 379 ± 31                                                   | 19                 |
| Uninjected             | 34 ± 1                                                     | 161                |
| Water                  | 32 ± 1                                                     | 96                 |

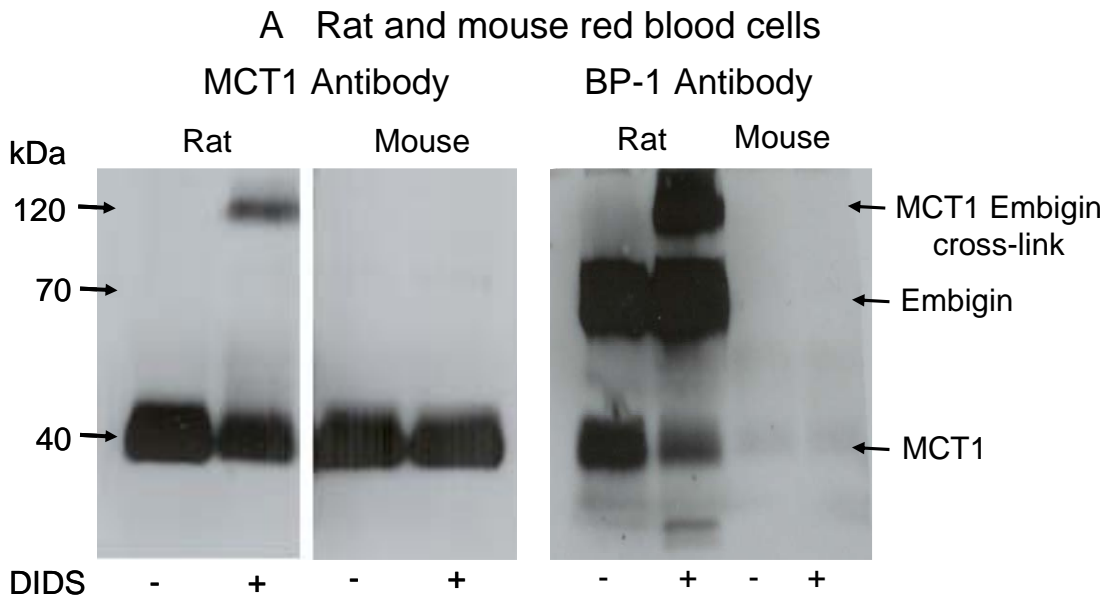

**B COS-7 cells over-expressing MCT1 with basigin or embigin**

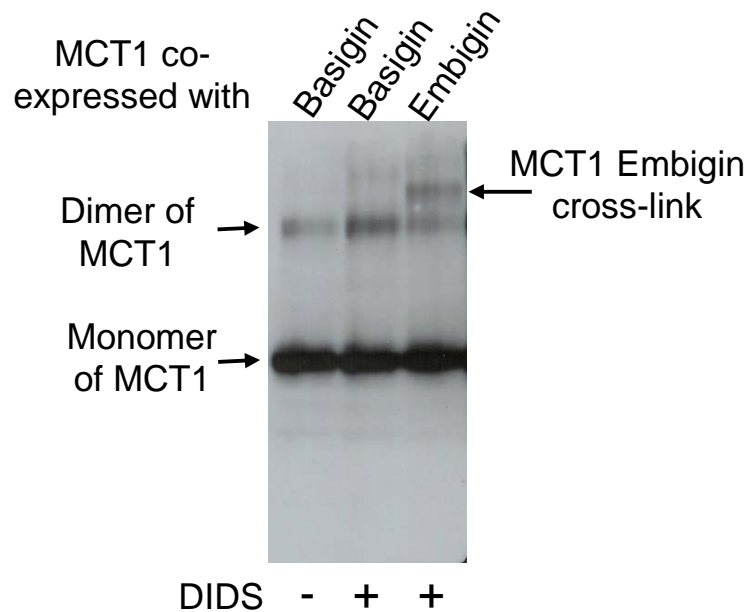

**Supplementary Figure 1. DIDS does not cross-link basigin to MCT1.** In Panel A rat or mouse erythrocytes were incubated with or without 0.1 mM DIDS and red cell ghost membrane prepared as described in the Experimental section. Samples were separated by SDS-PAGE and Western blots performed using either the C-terminal MCT1 antibody or an antibody to the embigin/MCT1 DIDS cross-linked product (BP-1 antibody) as indicated. In Panel B COS-7 cells were transfected with MCT1 + basigin (Lanes 1 and 2) or MCT1 + embigin (Lane 3). COS cells were harvested 48 hr after transfection and treated  $\pm$  0.2 mM DIDS as indicated, washed and lysed. SDS-PAGE and Western blots were performed on the crude lysates using anti-MCT1 antibody.

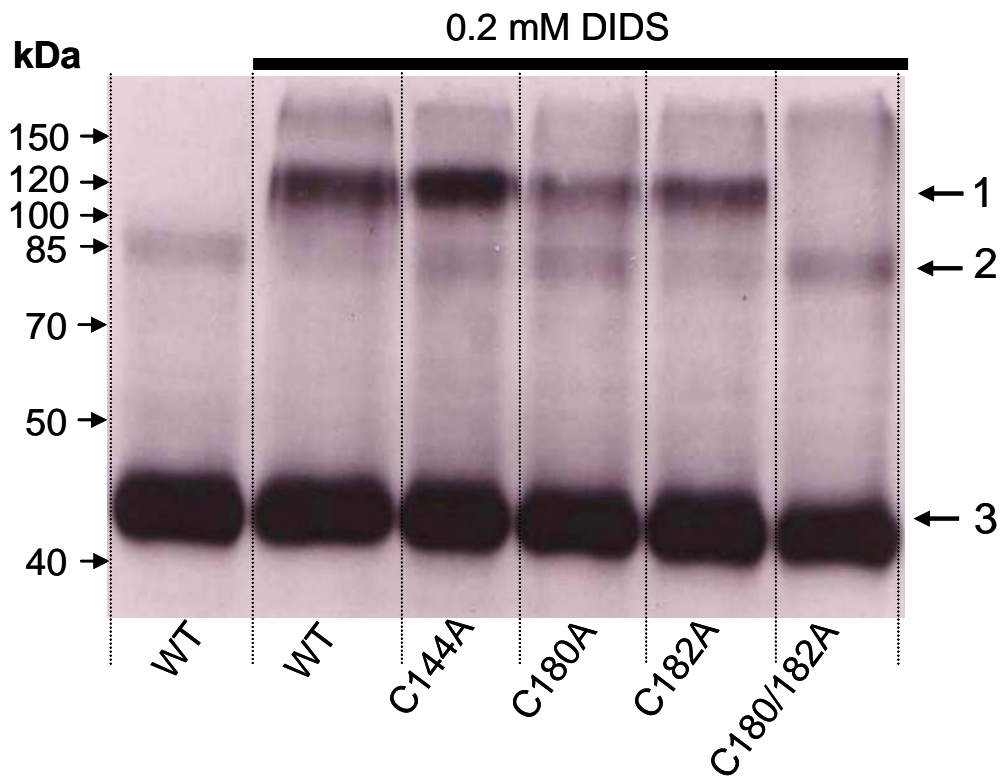

**Supplementary Figure 2 C180A/C182A embigin does not exhibit DIDS cross-linking to MCT1.** C180 usually forms the cysteine bridge that stabilises the V immunoglobulin domain of embigin, although our data suggest that C182 may also fulfil this role in the absence of C180. Preventing this cross-link is thought to disrupt this V domain and prevent correct alignment of K160 and K164 of DIDS to allow cross-linking to MCT1.

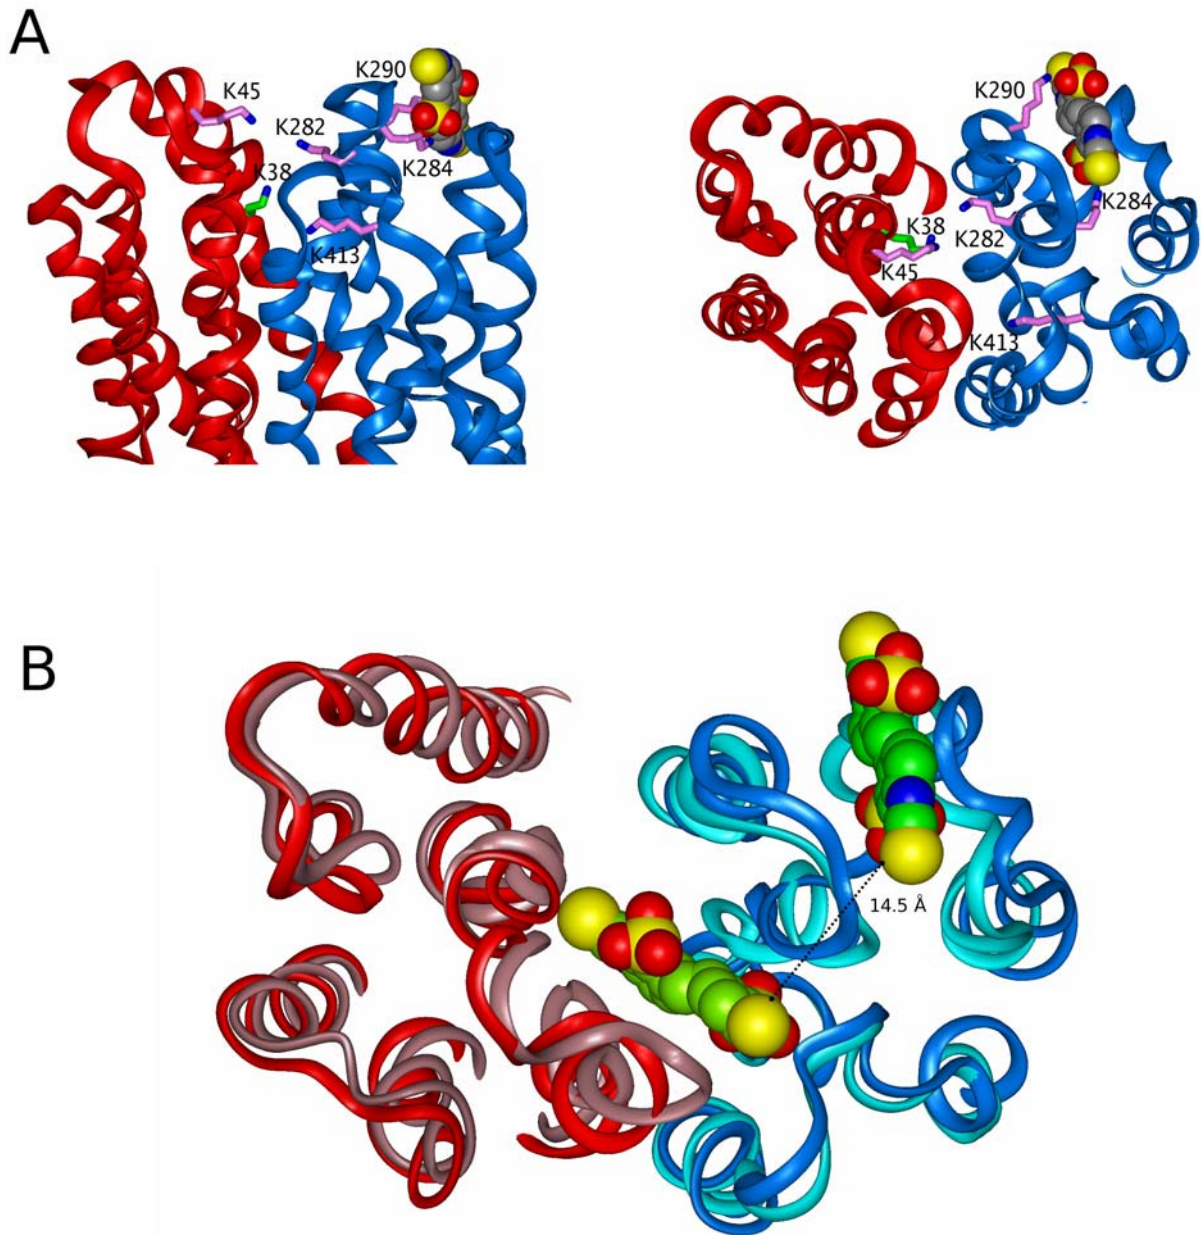

### Supplementary Figure 3 An alternative weak binding site for DIDS on MCT1

In Panel A presents sideways (left) and top-down (right) views of an energy-minimised model that shows DIDS binding to a shallow groove between the loops connecting helices 7 & 8 and helices 9 & 10. K284 forms a salt bridge with one sulfonate group of DIDS while the tip of K290 is in Van de Waals contact with the isothiocyanate group at the other ring of DIDS. Colouring and views are analogous to those of Figures 7 and 9 in main paper. In Panel B this weak binding site (darker shade) is overlaid on the tight binding site (lighter shade) to show the displacement of the emerging isothiocyanate group involved in cross-linking to embigin.
